# Supplementary material
Source: Springer Nature journal article supplement (https://www.springermedizin.de/resource/supplementary/13012_2013_690_MOESM2_ESM.pdf/9630248)

■ Daily   ■ Weekly   ■ Monthly   ■ Quarterly   ■ Yearly   ■ None

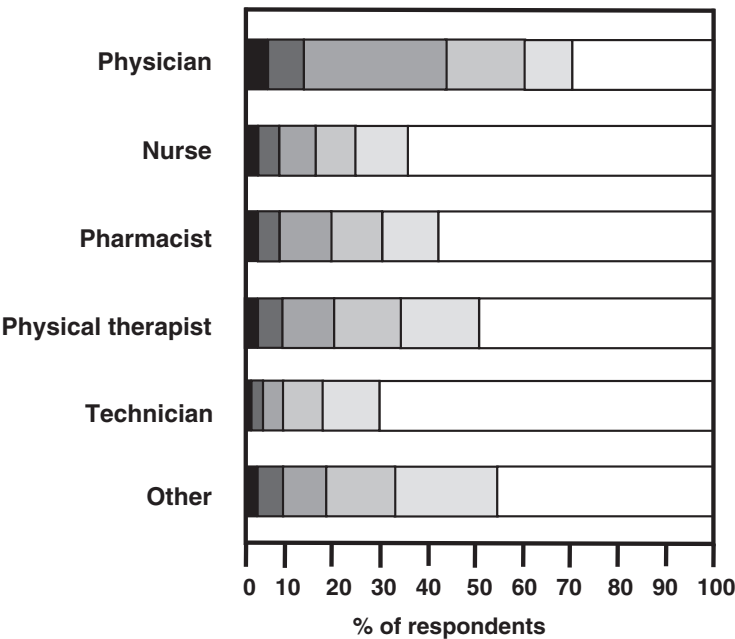

Supplement: MOESM2 [file 9630248]
